# Supplementary material for: Risk of Major Cardiovascular and Cerebrovascular Events in Users of Lisdexamfetamine and Other Medications for Attention-Deficit/Hyperactivity Disorder in Denmark and Sweden: A Population-Based Cohort Study
Source: Springer Nature journal article supplement (doi:10.1007/s40120-022-00396-y), 2022-08-26
Supplement: MOESM1 [file 23421864]

# Risk of Major Cardiovascular and Cerebrovascular Events in Users of Lisdexamfetamine and Other Medications for Attention-Deficit/Hyperactivity Disorder in Denmark and Sweden: A Population-Based Cohort Study

## Authors:

Joan Forns ([0000-0002-1066-0358](#)),<sup>1</sup> Elena Dudukina ([0000-0002-4238-049X](#)),<sup>2</sup>  
David Hägg ([0000-0002-2610-5033](#)),<sup>3</sup> Péter Szentkúti ([0000-0002-7831-999X](#)),<sup>2</sup>  
Karin Gembert ([0000-0003-2536-1577](#)),<sup>3</sup> Estel Plana ([0000-0001-8675-7503](#)),<sup>1</sup>  
Alicia Gilsean ([0000-0002-9266-1417](#)),<sup>4</sup> Erzsébet Horváth-Puhó ([0000-0002-3594-2212](#)),<sup>2</sup> Vera Ehrenstein ([0000-0002-3415-3254](#)),<sup>2</sup> Johan Reutfors ([0000-0003-1372-4262](#)),<sup>3</sup> Cristina Rebordosa ([0000-0002-8064-5997](#))<sup>1</sup>

<sup>1</sup>Department of Epidemiology, RTI Health Solutions, Barcelona, Spain; <sup>2</sup>Department of Clinical Epidemiology, Aarhus University, Aarhus, Denmark; <sup>3</sup>Department of Medicine, Centre for Pharmacoepidemiology, Karolinska University Hospital, Karolinska Institutet, Solna, Sweden; <sup>4</sup>Department of Epidemiology, RTI Health Solutions, Research Triangle Park, NC, USA

**Corresponding author:** Joan Forns, RTI Health Solutions, Av. Diagonal, 605, 9-1, 08028 Barcelona, Spain; [jforns@rti.org](mailto:jforns@rti.org); +34.93.241.7766

## Bias Analysis of Unmeasured Confounding

A bias analysis was conducted to assess the potential impact on the results of residual confounding due to unmeasured variables or poorly measured variables, such as those for which proxies were used. The incidence rate ratio (IRR) adjusted for different hypothetical scenarios of unmeasured confounding was calculated (Figure S1 and S2). In these figures, different IRRs of the association between an unmeasured confounder and major adverse cardiovascular and cerebrovascular events (MACE) (0.3, 0.5, 2.0, and 3.0) and a range of differences in percentage (from -100% to +100%) of person-time of an unmeasured confounder between the two cohorts (LDX users – Previous users) were used to derive the IRR adjusted for the potential unmeasured confounder. For example, in Denmark, in an extreme scenario (IRR, 0.3 for the unmeasured confounder and MACE and 100% difference of person-time between lisdexamfetamine dimesylate [LDX] users and previous users), the adjusted IRR for MACE would be approximately 3.5. In a scenario with an IRR between an unmeasured confounder and MACE of 2 and a 25% difference of person-time between LDX users and previous users, the adjusted IRR for MACE would be 1.30 (the adjusted IRR observed in the main analysis was 1.01). In Sweden, bias analysis for an unmeasured confounder showed similar results. In both countries, only in extreme scenarios of an unmeasured confounder strongly associated with MACE and much more prevalent in LDX users than in previous users would the adjusted IRR for MACE be higher than 3.

**Figure S1. Sensitivity Analysis: Bias Analysis, Incidence Rate Ratio After Adjusting for an Unmeasured Confounder, by Confounder Prevalence During Current Time at Risk for MACE, Denmark**

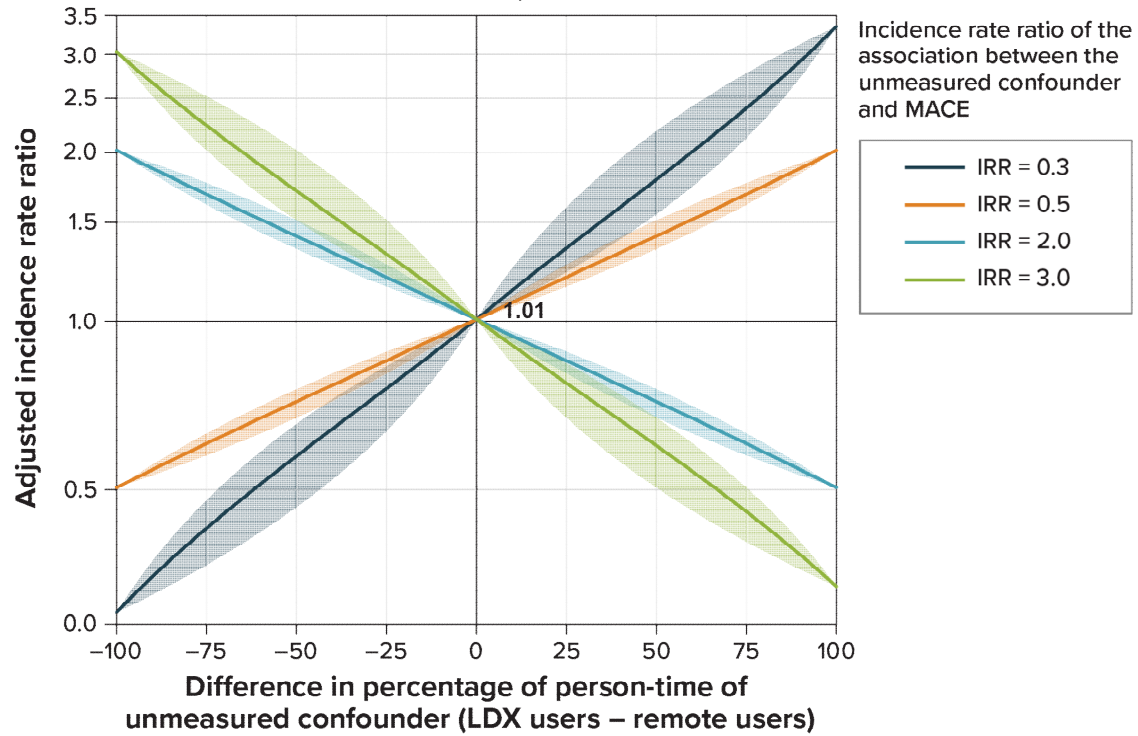

IRR: incidence rate ratio; LDX: lisdexamphetamine dimesylate; MACE: major adverse cardiovascular and cerebrovascular events.

**Figure S2. Sensitivity Analysis: Bias Analysis, Incidence Rate Ratio After Adjusting for an Unmeasured Confounder, by Confounder Prevalence During Current Time at Risk for MACE, Sweden**

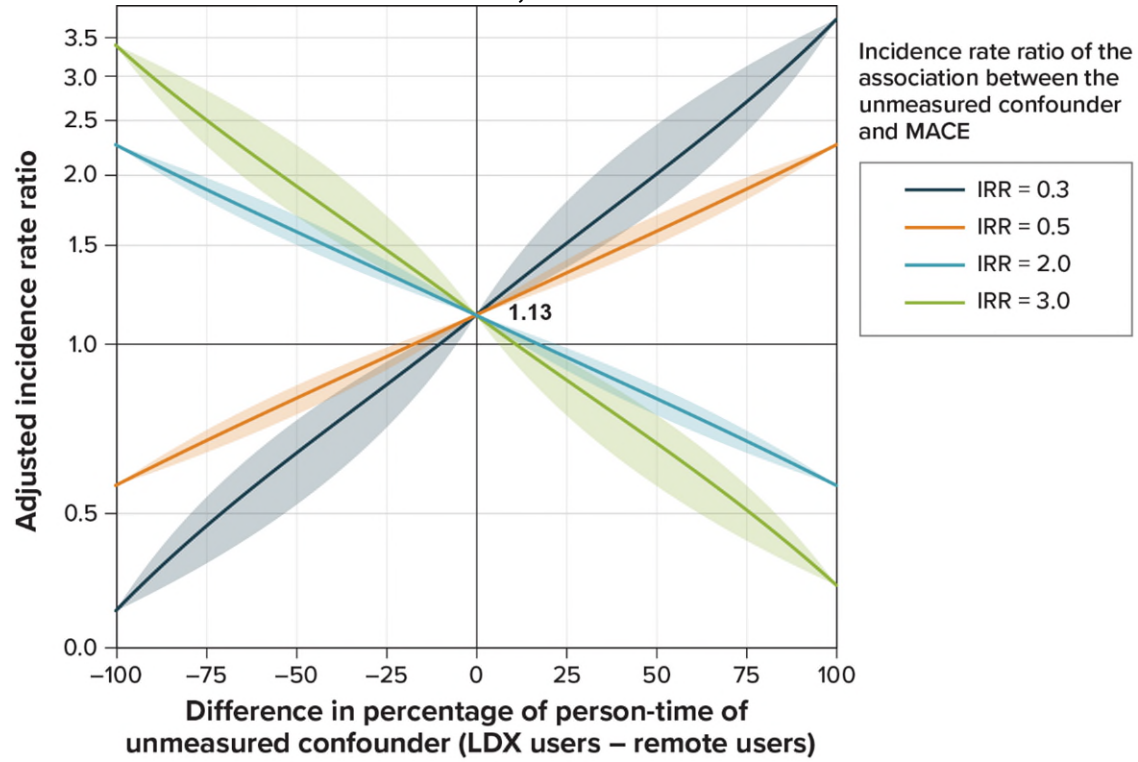

IRR: incidence rate ratio; LDX: lisdexamfetamine dimesylate; MACE: major adverse cardiovascular and cerebrovascular events.

## Exploratory and Sensitivity Analyses

**Table S1. Exploratory Analysis: Adjusted Incidence Rates and Incidence Rate Ratios for MACE for LDX Patients and Previous Users, Trimmed Population for Denmark, Sweden, and Pooled**

| Endpoint                                         | LDX Users          |                                  |                 |                                       | Remote Users                    |                                  |                 |                                       |                             |
|--------------------------------------------------|--------------------|----------------------------------|-----------------|---------------------------------------|---------------------------------|----------------------------------|-----------------|---------------------------------------|-----------------------------|
|                                                  | Number of Patients | Number With Outcome <sup>a</sup> | PY <sup>b</sup> | IR per 1,000 PY (95% CI) <sup>c</sup> | Number of Patients <sup>d</sup> | Number With Outcome <sup>a</sup> | PY <sup>b</sup> | IR per 1,000 PY (95% CI) <sup>c</sup> | IRR <sup>c,e</sup> (95% CI) |
| <b>Denmark</b>                                   |                    |                                  |                 |                                       |                                 |                                  |                 |                                       |                             |
| Sex                                              |                    |                                  |                 |                                       |                                 |                                  |                 |                                       |                             |
| Male                                             | 2,887              | <5                               |                 | 1.39 (0.52-3.72)                      | 14,390                          | 48                               | 24,724.0        | 1.77 (1.28-2.44)                      | 0.79 (0.28-2.25)            |
| Female                                           | 2,629              | N.R.                             |                 | 1.68 (0.69-4.10)                      | 13,104                          | 28                               | 22,550.8        | 1.27 (0.87-1.85)                      | 1.33 (0.44-4.03)            |
| Age (years)                                      |                    |                                  |                 |                                       |                                 |                                  |                 |                                       |                             |
| 18-29                                            | 2,706              | <5                               |                 | N.E.                                  | 13,768                          | <5                               |                 | N.E.                                  | 4.24 (0.75-23.88)           |
| 30-39                                            | 1,406              | <5                               |                 | N.E.                                  | 6,967                           | N.R.                             |                 | N.E.                                  | 2.62 (0.55-12.55)           |
| 40-49                                            | 1,027              | <5                               |                 | 1.66 (0.41-6.67)                      | 4,970                           | 33                               | 8,833.5         | 3.56 (2.48-5.12)                      | 0.47 (0.10-2.10)            |
| > 50                                             | 377                | <5                               |                 | 7.76 (2.50-24.14)                     | 1,789                           | 31                               | 3,285.7         | 9.39 (6.57-13.44)                     | 0.83 (0.25-2.76)            |
| Impact of long-term exposure <sup>f</sup>        |                    |                                  |                 |                                       |                                 |                                  |                 |                                       |                             |
| Long-term LDX users vs. long-term previous users | 1,939              | N.R.                             |                 | 2.41 (1.08-5.38)                      | 17,060                          | 53                               | 25,547.4        | 2.01 (1.50-2.70)                      | 1.20 (0.49-2.92)            |
| Daily dose at index date                         |                    |                                  |                 |                                       |                                 |                                  |                 |                                       |                             |
| 20 mg                                            | 856                | <5                               |                 | 2.39 (0.33-17.49)                     |                                 |                                  |                 |                                       | 1.54 (0.19-12.52)           |
| 30 mg                                            | 3,694              | N.R.                             |                 | N.E.                                  |                                 |                                  |                 |                                       | 1* (Ref.)                   |
| 40 mg                                            | 61                 | 0                                | 35.9            | N.E.                                  |                                 |                                  |                 |                                       | N.E.                        |
| 50 mg                                            | 476                | 0                                | 518.0           | N.E.                                  |                                 |                                  |                 |                                       | N.E.                        |

| Endpoint                                                                    | LDX Users          |                                  |                 |                                       | Remote Users                    |                                  |                 |                                       |                             |
|-----------------------------------------------------------------------------|--------------------|----------------------------------|-----------------|---------------------------------------|---------------------------------|----------------------------------|-----------------|---------------------------------------|-----------------------------|
|                                                                             | Number of Patients | Number With Outcome <sup>a</sup> | PY <sup>b</sup> | IR per 1,000 PY (95% CI) <sup>c</sup> | Number of Patients <sup>d</sup> | Number With Outcome <sup>a</sup> | PY <sup>b</sup> | IR per 1,000 PY (95% CI) <sup>c</sup> | IRR <sup>c,e</sup> (95% CI) |
| 60 mg                                                                       | 53                 | 0                                | 41.9            | N.E.                                  |                                 |                                  |                 |                                       | N.E.                        |
| 70 mg                                                                       | 297                | <5                               |                 | N.E.                                  |                                 |                                  |                 |                                       | 1.61 (0.20-13.06)           |
| Other                                                                       | 79                 | 0                                | 98.1            | N.E.                                  |                                 |                                  |                 |                                       | N.E.                        |
| Impact of other ADHD treatments                                             |                    |                                  |                 |                                       |                                 |                                  |                 |                                       |                             |
| Current single LDX users vs. previous users                                 | 4,437              | N.R.                             |                 | 1.76 (0.84-3.69)                      | 27,494                          | 76                               | 47,274.7        | 1.61 (1.27-2.03)                      | 1.10 (0.48-2.49)            |
| Current LDX users with other ADHD medications <sup>g</sup> vs. previous use | 4,051              | <5                               |                 | 1.26 (0.31-5.04)                      | 27,494                          | 76                               | 47,274.7        | 1.60 (1.27-2.03)                      | 0.78 (0.18-3.33)            |
| Previous history of cardiovascular disease                                  |                    |                                  |                 |                                       |                                 |                                  |                 |                                       |                             |
| Yes                                                                         | 464                | 0                                | 478.3           | N.E.                                  | 2,271                           | 35                               | 3,954.2         | 8.66 (6.09-12.30)                     | N.E.                        |
| No                                                                          | 5,052              | 9                                | 5,029.6         | 1.77 (0.92-3.41)                      | 25,223                          | 41                               | 43,320.6        | 0.95 (0.69-1.30)                      | 1.87 (0.86-4.06)            |
| Diagnosis of ADHD                                                           |                    |                                  |                 |                                       |                                 |                                  |                 |                                       |                             |
| Yes                                                                         | 2,351              | N.R.                             |                 | 2.23 (0.92-5.39)                      | 11,926                          | 22                               | 19,153.9        | 1.16 (0.75-1.80)                      | 1.92 (0.59-6.20)            |
| No                                                                          | 3,165              | <5                               |                 | 1.19 (0.45-3.18)                      | 15,568                          | 54                               | 28,120.8        | 1.88 (1.42-2.49)                      | 0.64 (0.22-1.83)            |
| Previous history of psychiatric disease                                     |                    |                                  |                 |                                       |                                 |                                  |                 |                                       |                             |
| Yes                                                                         | 2,588              | N.R.                             |                 | 2.39 (1.07-5.34)                      | 13,204                          | 44                               | 22,326.7        | 1.90 (1.38-2.61)                      | 1.26 (0.50-3.16)            |
| No                                                                          | 2,928              | <5                               |                 | 0.94 (0.30-2.94)                      | 14,290                          | 32                               | 24,948.1        | 1.30 (0.90-1.86)                      | 0.73 (0.20-2.61)            |
| <b>Sweden</b>                                                               |                    |                                  |                 |                                       |                                 |                                  |                 |                                       |                             |
| Sex                                                                         |                    |                                  |                 |                                       |                                 |                                  |                 |                                       |                             |

| Endpoint                                         | LDX Users          |                                  |                 |                                       | Remote Users                    |                                  |                 |                                       |                             |
|--------------------------------------------------|--------------------|----------------------------------|-----------------|---------------------------------------|---------------------------------|----------------------------------|-----------------|---------------------------------------|-----------------------------|
|                                                  | Number of Patients | Number With Outcome <sup>a</sup> | PY <sup>b</sup> | IR per 1,000 PY (95% CI) <sup>c</sup> | Number of Patients <sup>d</sup> | Number With Outcome <sup>a</sup> | PY <sup>b</sup> | IR per 1,000 PY (95% CI) <sup>c</sup> | IRR <sup>c,e</sup> (95% CI) |
| Male                                             | 20,234             | 43                               | 23,108.9        | 6.31 (4.68-8.51)                      | 100,763                         | 87                               | 62,753.4        | 4.72 (3.83-5.83)                      | 1.34 (0.80-2.22)            |
| Female                                           | 19,929             | 20                               | 21,915.8        | 4.63 (2.99-7.18)                      | 99,626                          | 57                               | 59,987.1        | 5.58 (4.30-7.23)                      | 0.83 (0.41-1.67)            |
| Age (years)                                      |                    |                                  |                 |                                       |                                 |                                  |                 |                                       |                             |
| 18-29                                            | 18,285             | 2                                | 18,878.5        | 0.42 (0.10-1.67)                      | 93,893                          | 13                               | 57,558.0        | 0.77 (0.45-1.33)                      | 0.54 (0.12-2.45)            |
| 30-39                                            | 11,041             | 8                                | 13,066.8        | 1.22 (0.61-2.44)                      | 54,184                          | 27                               | 32,966.8        | 1.38 (0.95-2.01)                      | 0.88 (0.28-2.81)            |
| 40-49                                            | 6,988              | 25                               | 8,501.0         | 12.64 (8.54-18.71)                    | 34,332                          | 38                               | 21,207.6        | 8.56 (6.23-11.76)                     | 1.48 (0.68-3.20)            |
| > 50                                             | 3,849              | 28                               | 4,578.4         | 25.18 (17.38-36.47)                   | 17,980                          | 66                               | 11,008.1        | 26.15 (20.55-33.29)                   | 0.96 (0.54-1.71)            |
| Impact of long-term exposure <sup>f</sup>        |                    |                                  |                 |                                       |                                 |                                  |                 |                                       |                             |
| Long-term LDX users vs. long-term previous users | 16,416             | 31                               | 19,334.2        | 5.22 (3.67-7.42)                      | 43,861                          | 8                                | 10,408.5        | 2.52 (1.26-5.04)                      | 2.07 (0.87-4.90)            |
| Daily Dose at index date                         |                    |                                  |                 |                                       |                                 |                                  |                 |                                       |                             |
| 20 mg                                            | 5,918              | 4                                | 3,905.8         | 4.28 (1.61-11.40)                     |                                 |                                  |                 |                                       | 0.96 (0.34-2.72)            |
| 30 mg                                            | 28,062             | 41                               | 33,631.0        | 4.47 (3.29-6.07)                      |                                 |                                  |                 |                                       | 1* (Ref.)                   |
| 40 mg                                            | 393                | 0                                | 316.3           | N.E.                                  |                                 |                                  |                 |                                       | N.E.                        |
| 50 mg                                            | 3,044              | 9                                | 3,746.2         | 8.89 (4.62-17.08)                     |                                 |                                  |                 |                                       | 1.99 (0.97-4.10)            |
| 60 mg                                            | 164                | 0                                | 114.4           | N.E.                                  |                                 |                                  |                 |                                       | N.E.                        |
| 70 mg                                            | 1,605              | 4                                | 1,981.4         | 7.49 (2.81-19.95)                     |                                 |                                  |                 |                                       | 1.68 (0.60-4.69)            |
| Other                                            | 894                | 5                                | 1,227.1         | 14.78 (6.15-35.51)                    |                                 |                                  |                 |                                       | 3.31 (1.31-8.38)            |
| Impact of other ADHD treatments                  |                    |                                  |                 |                                       |                                 |                                  |                 |                                       |                             |

| Endpoint                                                                      | LDX Users          |                                  |                 |                                       | Remote Users                    |                                  |                 |                                       |                             |
|-------------------------------------------------------------------------------|--------------------|----------------------------------|-----------------|---------------------------------------|---------------------------------|----------------------------------|-----------------|---------------------------------------|-----------------------------|
|                                                                               | Number of Patients | Number With Outcome <sup>a</sup> | PY <sup>b</sup> | IR per 1,000 PY (95% CI) <sup>c</sup> | Number of Patients <sup>d</sup> | Number With Outcome <sup>a</sup> | PY <sup>b</sup> | IR per 1,000 PY (95% CI) <sup>c</sup> | IRR <sup>c,e</sup> (95% CI) |
| Current single LDX users vs. previous users                                   | 35,592             | 41                               | 34,167.2        | 4.55 (3.35-6.18)                      | 200,389                         | 144                              | 122,740.5       | 5.06 (4.30-5.95)                      | 0.90 (0.50-1.61)            |
| Current LDX users with other ADHD medications <sup>g</sup> vs. previous users | 26,027             | 22                               | 10,857.4        | 6.81 (4.48-10.34)                     | 200,389                         | 144                              | 122,740.5       | 5.15 (4.38-6.07)                      | 1.32 (0.85-2.06)            |
| Previous history of cardiovascular disease                                    |                    |                                  |                 |                                       |                                 |                                  |                 |                                       |                             |
| Yes                                                                           | 4,390              | 23                               | 5,054.8         | 13.88 (9.22-20.89)                    | 21,496                          | 73                               | 13,065.3        | 16.86 (13.40-21.20)                   | 0.82 (0.44-1.55)            |
| No                                                                            | 35,773             | 40                               | 39,969.8        | 4.79 (3.52-6.54)                      | 178,893                         | 71                               | 109,675.2       | 3.49 (2.77-4.41)                      | 1.37 (0.79-2.39)            |
| Diagnosis of ADHD                                                             |                    |                                  |                 |                                       |                                 |                                  |                 |                                       |                             |
| Yes                                                                           | 33,239             | 49                               | 37,271.7        | 4.66 (3.52-6.16)                      | 171,112                         | 113                              | 103,924.7       | 3.92 (3.26-4.71)                      | 1.19 (0.74-1.90)            |
| No                                                                            | 6,924              | 14                               | 7,753.0         | 8.54 (5.06-14.42)                     | 29,277                          | 31                               | 18,815.8        | 8.33 (5.86-11.84)                     | 1.03 (0.54-1.93)            |
| Previous history of psychiatric disease                                       |                    |                                  |                 |                                       |                                 |                                  |                 |                                       |                             |
| Yes                                                                           | 29,879             | 53                               | 33,671.0        | 5.02 (3.83-6.57)                      | 146,942                         | 123                              | 89,552.0        | 4.32 (3.62-5.15)                      | 1.16 (0.75-1.80)            |
| No                                                                            | 10,284             | 10                               | 11,353.6        | 7.86 (4.23-14.61)                     | 53,447                          | 21                               | 33,188.6        | 8.56 (5.58-13.13)                     | 0.92 (0.29-2.86)            |



| Endpoint                                        | LDX Users          |                                  |                 |                                       | Remote Users                    |                                  |                 |                                       |                             |
|-------------------------------------------------|--------------------|----------------------------------|-----------------|---------------------------------------|---------------------------------|----------------------------------|-----------------|---------------------------------------|-----------------------------|
|                                                 | Number of Patients | Number With Outcome <sup>a</sup> | PY <sup>b</sup> | IR per 1,000 PY (95% CI) <sup>c</sup> | Number of Patients <sup>d</sup> | Number With Outcome <sup>a</sup> | PY <sup>b</sup> | IR per 1,000 PY (95% CI) <sup>c</sup> | IRR <sup>c,e</sup> (95% CI) |
| <b>Pooled</b>                                   |                    |                                  |                 |                                       |                                 |                                  |                 |                                       |                             |
| Sex                                             |                    |                                  |                 |                                       |                                 |                                  |                 |                                       |                             |
| Male                                            | 23,121             | 44-47                            |                 | N.E.                                  | 115,153                         | 135                              | 87,477.4        | 1.62 (1.16-2.25)                      | 1.21 (0.77-1.91)            |
| Female                                          | 22,558             | 25-29                            |                 | N.E.                                  | 112,730                         | 85                               | 82,537.9        | 1.05 (0.81-1.35)                      | 0.95 (0.53-1.71)            |
| Age (years)                                     |                    |                                  |                 |                                       |                                 |                                  |                 |                                       |                             |
| 18-29                                           | 20,991             | 3-6                              |                 | N.E.                                  | 107,661                         | 14-17                            |                 | N.E.                                  | 1.45 (0.19-10.91)           |
| 30-39                                           | 12,447             | 9-12                             |                 | N.E.                                  | 61,151                          | 32-36                            |                 | N.E.                                  | 1.33 (0.47-3.73)            |
| 40-49                                           | 8,015              | 26-29                            |                 | N.E.                                  | 39,302                          | 71                               | 30,041.1        | 2.58 (1.26-5.30)                      | 1.00 (0.34-2.92)            |
| > 50                                            | 4,226              | 29-32                            |                 | N.E.                                  | 19,769                          | 97                               | 14,293.8        | 7.38 (4.74-11.49)                     | 0.94 (0.56-1.57)            |
| Impact of long-term exposure                    |                    |                                  |                 |                                       |                                 |                                  |                 |                                       |                             |
| Long-term LDX users vs long-term previous users | 18,355             | 36-40                            |                 | N.E.                                  | 60,921                          | 61                               | 35,955.9        | 1.33 (0.51-3.50)                      | 1.59 (0.86-2.95)            |
| Daily dose at index date                        |                    |                                  |                 |                                       |                                 |                                  |                 |                                       |                             |
| 20 mg                                           | 6,774              | 5-8                              |                 | N.E.                                  |                                 |                                  |                 |                                       | 1.05 (0.41-2.68)            |
| 30 mg                                           | 31,756             | 46-50                            |                 | N.E.                                  |                                 |                                  |                 |                                       | 1* (Ref.)                   |
| 40 mg                                           | 454                | 0                                | 352.2           | 4.70 (0.56-39.66)                     |                                 |                                  |                 |                                       | N.E.                        |
| 50 mg                                           | 3,520              | 9                                | 4,264.2         | 2.29 (1.21-4.32)                      |                                 |                                  |                 |                                       | N.E.                        |
| 60 mg                                           | 217                | 0                                | 156.3           | 7.22 (1.02-51.24)                     |                                 |                                  |                 |                                       | N.E.                        |
| 70 mg                                           | 1,902              | 5-8                              |                 | N.E.                                  |                                 |                                  |                 |                                       | 1.66 (0.66-4.18)            |
| Other                                           | 973                | 5                                | 1,325.2         | 4.16 (1.80-9.59)                      |                                 |                                  |                 |                                       | N.E.                        |

| Endpoint                                            | LDX Users          |                                  |                 |                                       | Remote Users                    |                                  |                 |                                       |                             |
|-----------------------------------------------------|--------------------|----------------------------------|-----------------|---------------------------------------|---------------------------------|----------------------------------|-----------------|---------------------------------------|-----------------------------|
|                                                     | Number of Patients | Number With Outcome <sup>a</sup> | PY <sup>b</sup> | IR per 1,000 PY (95% CI) <sup>c</sup> | Number of Patients <sup>d</sup> | Number With Outcome <sup>a</sup> | PY <sup>b</sup> | IR per 1,000 PY (95% CI) <sup>c</sup> | IRR <sup>c,e</sup> (95% CI) |
| Impact of other ADHD treatments                     |                    |                                  |                 |                                       |                                 |                                  |                 |                                       |                             |
| Current single LDX users vs previous users          | 40,029             | 46-50                            |                 | N.E.                                  | 227,883                         | 220                              | 170,015.2       | 1.36 (1.00-1.85)                      | 0.96 (0.60-1.54)            |
| Current LDX users with other ADHD vs previous users | 30,078             | 23-26                            |                 | N.E.                                  | 227,883                         | 220                              | 170,015.2       | 1.36 (1.00-1.85)                      | 1.26 (0.83-1.93)            |
| Previous history of cardiovascular disease          |                    |                                  |                 |                                       |                                 |                                  |                 |                                       |                             |
| Yes                                                 | 4,854              | 23                               | 5,533.1         | 4.24 (2.29-7.85)                      | 23,767                          | 108                              | 17,019.5        | 6.92 (4.41-10.85)                     | N.E.                        |
| No                                                  | 40,825             | 49                               | 44,999.4        | 1.24 (0.72-2.16)                      | 204,116                         | 112                              | 152,995.8       | 0.77 (0.53-1.12)                      | 1.53 (0.97-2.40)            |
| Diagnosis of ADHD                                   |                    |                                  |                 |                                       |                                 |                                  |                 |                                       |                             |
| Yes                                                 | 35,590             | 54-58                            |                 | N.E.                                  | 183,038                         | 135                              | 123,078.6       | 1.10 (0.93-1.30)                      | 1.27 (0.82-1.96)            |
| No                                                  | 10,089             | 15-18                            |                 | N.E.                                  | 44,845                          | 85                               | 46,936.6        | 1.82 (1.47-2.25)                      | 0.90 (0.53-1.56)            |
| Previous history of psychiatric disease             |                    |                                  |                 |                                       |                                 |                                  |                 |                                       |                             |
| Yes                                                 | 32,467             | 58-62                            |                 | N.E.                                  | 160,146                         | 167                              | 111,878.7       | 1.61 (1.13-2.29)                      | 1.18 (0.79-1.75)            |
| No                                                  | 13,212             | 11-14                            |                 | N.E.                                  | 67,737                          | 53                               | 58,136.7        | 0.91 (0.46-1.82)                      | 0.83 (0.35-1.94)            |

ADHD = attention-deficit/hyperactivity disorder; ATC = Anatomical Therapeutic Chemical Classification System; CI = confidence interval; LDX = lisdexamfetamine dimesylate; MACE = major cardiovascular endpoint; PY = person-years.

<sup>a</sup> Patients with MACE during current use.

<sup>b</sup> Patient-years accumulated over current/remote use, as defined for primary analysis, in patients at risk for MACE.

<sup>c</sup> Using random-effects meta-analysis for the pooled population.

<sup>d</sup> Total remote users represents total patient/index dates after matching and trimming.

<sup>e</sup> Using Poisson regression model adjusting for quintiles of the propensity score for the Danish and Swedish populations.

<sup>f</sup> Current LDX users with ≥12 months of cumulative exposure to LDX, i.e., those with ≥12 months duration of current LDX use.

<sup>9</sup> Other ADHD medications include amphetamine, dexamphetamine, methylphenidate, and atomoxetine. In addition, dexmethylphenidate (ATC code: N06BA11) users, if any, will be treated as users of methylphenidate.

\* This is a trend-dose analysis among only LDX users.

**Table S2. Sensitivity Analysis: Incidence Rates and Incidence Rate Ratios for MACE for LDX Patients and Remote Users, Trimmed Population in Denmark, Sweden, and Pooled**

| Endpoint                                                                         | LDX Users          |                                  |                 |                                       | Remote Users                    |                                  |                 |                                       |                             |
|----------------------------------------------------------------------------------|--------------------|----------------------------------|-----------------|---------------------------------------|---------------------------------|----------------------------------|-----------------|---------------------------------------|-----------------------------|
|                                                                                  | Number of Patients | Number With Outcome <sup>a</sup> | PY <sup>b</sup> | IR per 1,000 PY (95% CI) <sup>c</sup> | Number of Patients <sup>d</sup> | Number With Outcome <sup>a</sup> | PY <sup>b</sup> | IR per 1,000 PY (95% CI) <sup>c</sup> | IRR <sup>c,e</sup> (95% CI) |
| <b>Denmark</b>                                                                   |                    |                                  |                 |                                       |                                 |                                  |                 |                                       |                             |
| Impact of definition of exposure time                                            |                    |                                  |                 |                                       |                                 |                                  |                 |                                       |                             |
| Extending current use to 1* duration of prior dispensing                         | 5,516              | 9                                | 5,858.3         | 1.52 (0.79-2.93)                      | 27,494                          | 76                               | 47,274.7        | 1.60 (1.27-2.03)                      | 0.95 (0.45-2.00)            |
| Post-LDX users <sup>f</sup>                                                      |                    |                                  |                 |                                       |                                 |                                  |                 |                                       |                             |
| Post-LDX users vs previous users                                                 | 4,250              | 13                               | 5,557.9         | 2.27 (1.32-3.93)                      | 27,494                          | 76                               | 47,274.7        | 1.61 (1.27-2.03)                      | 1.42 (0.75-2.67)            |
| Post-LDX users with no other ADHD treatment vs. previous users                   | 3,536              | 7                                | 3,554.5         | 1.94 (0.93-4.08)                      | 27,494                          | 76                               | 47,274.7        | 1.60 (1.26-2.02)                      | 1.22 (0.54-2.74)            |
| Post-LDX users with use of other ADHD treatment vs. previous users               | 2,234              | 6                                | 2,003.3         | 2.89 (1.29-6.45)                      | 27,494                          | 76                               | 47,274.7        | 1.61 (1.28-2.04)                      | 1.79 (0.76-4.22)            |
| Intention to treat analysis                                                      | 5,516              | 22                               | 11,065.8        | 1.94 (1.27-2.96)                      | 27,494                          | 76                               | 47,274.7        | 1.60 (1.27-2.03)                      | 1.21 (0.71-2.07)            |
| Impact of inclusion criteria                                                     |                    |                                  |                 |                                       |                                 |                                  |                 |                                       |                             |
| Using same inclusion criteria in both study cohorts, current LDX vs previous use | 564                | 0                                | 515.1           | N.E.                                  | 2,792                           | 7                                | 5,456.0         | 1.29 (0.59-2.82)                      | N.E.                        |

| Endpoint                                                                                          | LDX Users          |                                  |                 |                                       | Remote Users                    |                                  |                 |                                       |                             |
|---------------------------------------------------------------------------------------------------|--------------------|----------------------------------|-----------------|---------------------------------------|---------------------------------|----------------------------------|-----------------|---------------------------------------|-----------------------------|
|                                                                                                   | Number of Patients | Number With Outcome <sup>a</sup> | PY <sup>b</sup> | IR per 1,000 PY (95% CI) <sup>c</sup> | Number of Patients <sup>d</sup> | Number With Outcome <sup>a</sup> | PY <sup>b</sup> | IR per 1,000 PY (95% CI) <sup>c</sup> | IRR <sup>c,e</sup> (95% CI) |
| Impact of previous exposure                                                                       |                    |                                  |                 |                                       |                                 |                                  |                 |                                       |                             |
| Current LDX users with no use of ADHD medication within the last 180 days vs previous users       | 4,369              | N.R.                             |                 | 1.53 (0.73-3.22)                      | 27,494                          | 76                               | 47,274.7        | 1.60 (1.26-2.02)                      | 0.96 (0.42-2.19)            |
| Current LDX users with previous use of ADHD medication within the last 180 days vs previous users | 1,147              | <5                               |                 | 1.97 (0.49-7.87)                      | 27,494                          | 76                               | 47,274.7        | 1.61 (1.27-2.03)                      | 1.22 (0.29-5.10)            |
| <b>Sweden</b>                                                                                     |                    |                                  |                 |                                       |                                 |                                  |                 |                                       |                             |
| Impact of definition of exposure time                                                             |                    |                                  |                 |                                       |                                 |                                  |                 |                                       |                             |
| Extending current use to 1*duration of prior dispensing                                           | 40,194             | 66                               | 48,043.5        | 1.99 (1.56-2.54)                      | 200,339                         | 144                              | 122,738.0       | 1.78 (1.51-2.09)                      | 1.12 (0.74-1.69)            |
| Post-LDX users <sup>f</sup>                                                                       |                    |                                  |                 |                                       |                                 |                                  |                 |                                       |                             |
| Post-LDX users vs. previous users                                                                 | 32,327             | 59                               | 42,266.5        | 1.76 (1.36-2.27)                      | 200,389                         | 144                              | 122,808.9       | 1.52 (1.30-1.80)                      | 1.16 (0.75-1.77)            |
| Post-LDX users with no other ADHD treatment vs. previous users                                    | 24,122             | 32                               | 28,401.8        | 1.42 (1.00-2.01)                      | 200,389                         | 144                              | 122,808.9       | 1.51 (1.28-1.78)                      | 0.94 (0.58-1.52)            |
| Post-LDX users with use of other ADHD treatment vs. previous users                                | 8,205              | 27                               | 13,864.7        | 2.42 (1.66-3.52)                      | 200,389                         | 144                              | 122,808.9       | 1.51 (1.28-1.78)                      | 1.60 (0.95-2.69)            |
| Intention to treat analysis                                                                       | 40,163             | 122                              | 88,365.4        | 1.77 (1.48-2.12)                      | 200,389                         | 144                              | 122,740.5       | 1.56 (1.33-1.84)                      | 1.13 (0.78-1.66)            |

| Endpoint                                                                                          | LDX Users          |                                  |                 |                                       | Remote Users                    |                                  |                 |                                       |                             |
|---------------------------------------------------------------------------------------------------|--------------------|----------------------------------|-----------------|---------------------------------------|---------------------------------|----------------------------------|-----------------|---------------------------------------|-----------------------------|
|                                                                                                   | Number of Patients | Number With Outcome <sup>a</sup> | PY <sup>b</sup> | IR per 1,000 PY (95% CI) <sup>c</sup> | Number of Patients <sup>d</sup> | Number With Outcome <sup>a</sup> | PY <sup>b</sup> | IR per 1,000 PY (95% CI) <sup>c</sup> | IRR <sup>c,e</sup> (95% CI) |
| Impact of inclusion criteria                                                                      |                    |                                  |                 |                                       |                                 |                                  |                 |                                       |                             |
| Using same inclusion criteria in both study cohorts, current LDX users vs. previous users         | 5,206              | 7                                | 5,163.7         | 2.24 (1.07-4.70)                      | 25,310                          | 17                               | 15,727.4        | 1.72 (1.07-2.76)                      | 1.30 (0.53-3.19)            |
| Impact of previous exposure                                                                       |                    |                                  |                 |                                       |                                 |                                  |                 |                                       |                             |
| Current LDX users with no use of ADHD medication within the last 180 days vs previous users       | 13,892             | 16                               | 12,970.3        | 1.89 (1.16-3.09)                      | 200,389                         | 144                              | 122,740.5       | 1.83 (1.56-2.16)                      | 1.03 (0.57-1.86)            |
| Current LDX users with previous use of ADHD medication within the last 180 days vs previous users | 26,271             | 47                               | 32,054.3        | 2.14 (1.61-2.85)                      | 200,389                         | 144                              | 122,740.5       | 1.83 (1.56-2.16)                      | 1.17 (0.75-1.81)            |
| <b>Pooled</b>                                                                                     |                    |                                  |                 |                                       |                                 |                                  |                 |                                       |                             |
| Impact of definition of exposure time                                                             |                    |                                  |                 |                                       |                                 |                                  |                 |                                       |                             |
| Extending current use carry over to 1*duration of prior dispensing                                | 45,710             | 75                               | 53,901.8        | 1.39 (1.11-1.75)                      | 227,833                         | 220                              | 170,012.8       | 1.36 (1.00-1.85)                      | 1.08 (0.75-1.55)            |
| Post-LDX users <sup>f</sup>                                                                       |                    |                                  |                 |                                       |                                 |                                  |                 |                                       |                             |
| Post-LDX users vs. previous users                                                                 | 36,577             | 72                               | 47,824.3        | 1.70 (1.04-2.79)                      | 227,883                         | 220                              | 170,083.6       | 1.36 (1.00-1.85)                      | 1.23 (0.86-1.76)            |
| Post-LDX users with no other ADHD treatment vs. previous users                                    | 27,658             | 39                               | 31,956.4        | 1.35 (0.81-2.25)                      | 227,883                         | 220                              | 170,083.6       | 1.36 (1.00-1.85)                      | 1.00 (0.66-1.52)            |

| Endpoint                                                                                          | LDX Users          |                                  |                 |                                       | Remote Users                    |                                  |                 |                                       |                             |
|---------------------------------------------------------------------------------------------------|--------------------|----------------------------------|-----------------|---------------------------------------|---------------------------------|----------------------------------|-----------------|---------------------------------------|-----------------------------|
|                                                                                                   | Number of Patients | Number With Outcome <sup>a</sup> | PY <sup>b</sup> | IR per 1,000 PY (95% CI) <sup>c</sup> | Number of Patients <sup>d</sup> | Number With Outcome <sup>a</sup> | PY <sup>b</sup> | IR per 1,000 PY (95% CI) <sup>c</sup> | IRR <sup>c,e</sup> (95% CI) |
| Post-LDX users with use of other ADHD treatment vs. previous users                                | 10,439             | 33                               | 15,868.0        | 2.11 (1.50-2.96)                      | 227,883                         | 220                              | 170,083.6       | 1.36 (1.00-1.85)                      | 1.65 (1.06-2.57)            |
| Intention-to-treat analysis                                                                       |                    | 144                              |                 | 1.57 (1.12-2.22)                      |                                 | 220                              |                 | 1.36 (1.00-1.85)                      | 1.16 (0.85-1.58)            |
| Impact of inclusion criteria                                                                      |                    |                                  |                 |                                       |                                 |                                  |                 |                                       |                             |
| Using same inclusion criteria in both study cohorts, current LDX users vs. previous users         | 5,770              | 7                                | 5,678.7         | 1.33 (0.65-2.71)                      |                                 | 24                               |                 | 1.14 (0.76-1.70)                      | N.E.                        |
| Impact of previous exposure                                                                       |                    |                                  |                 |                                       |                                 |                                  |                 |                                       |                             |
| Current LDX users with no use of ADHD medication within the last 180 days vs previous users       | 18,261             | 21-25                            |                 | N.E.                                  | 227,883                         | 220                              | 170,015.3       | 1.36 (1.00-1.85)                      | 1.01 (0.62-1.63)            |
| Current LDX users with previous use of ADHD medication within the last 180 days vs previous users | 27,418             | 48-51                            |                 | N.E.                                  | 227,883                         | 220                              | 170,015.3       | 1.36 (1.00-1.85)                      | 1.17 (0.77-1.78)            |

ADHD = attention-deficit/hyperactivity disorder; CI = confidence interval; IR = incidence rate; IRR = incidence rate ratio; LDX = lisdexamfetamine dimesylate; MACE = major cardiovascular endpoint; PY = person-years.

<sup>a</sup> Patients with MACE during use as described for each sensitivity analysis.

<sup>b</sup> Patient-years accumulated over use, as defined for each sensitivity analysis, in patients at risk for MACE.

<sup>c</sup> Using random-effects meta-analysis for the pooled population.

<sup>d</sup> Total remote users represents total patient/index dates after matching and trimming.

<sup>e</sup> Using Poisson regression model adjusting for quintiles of the propensity score for the Danish and Swedish populations.

<sup>f</sup> Post-LDX is the sum of all periods of time between episodes of LDX use or time after the last episode of current LDX use and the end of follow-up.
